# Supplementary material for: Understanding the role of TiO2crystal structure on the enhanced activity and stability of Ru/TiO2catalysts for the conversion of lignin-derived oxygenates
Source: Royal Society of Chemistry journal article supplement (doi:10.1039/c3gc41377b), 2013-10-22
Supplement: c3gc41377b.pdf [file c3gc41377b.pdf]

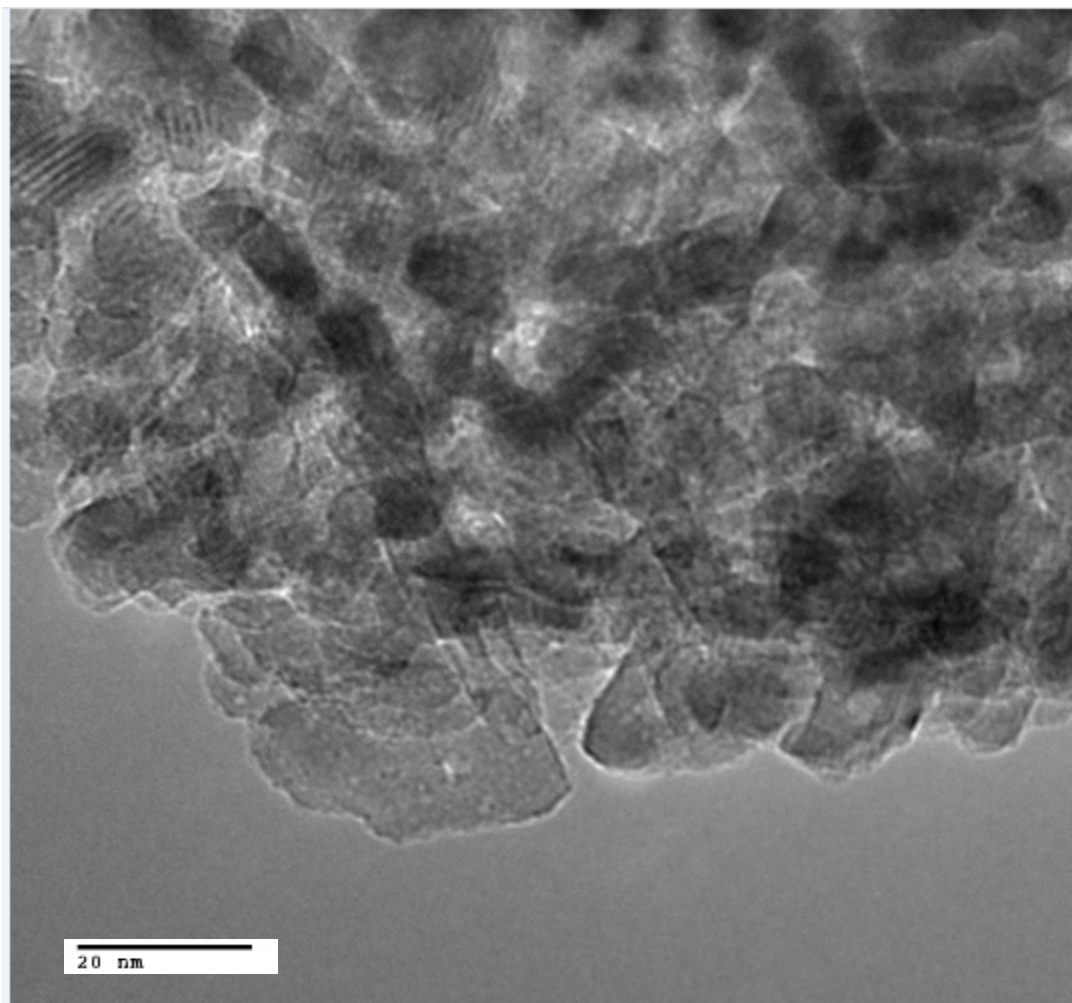

**Fig S1:** TEM image of RuTi400 samples pre-reduced at 400°C for one hour before imaging.

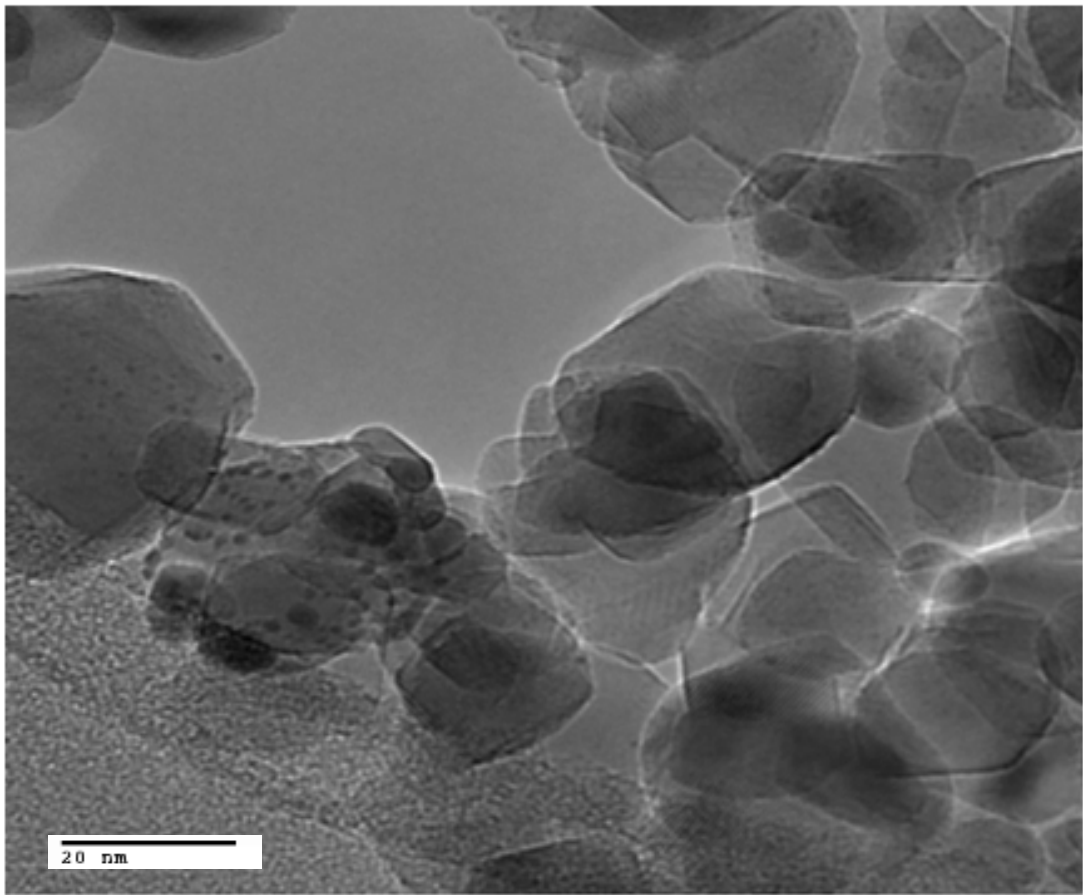

**Fig S2:** TEM image of RuTiP400 samples pre-reduced at 400°C for one hour before imaging.

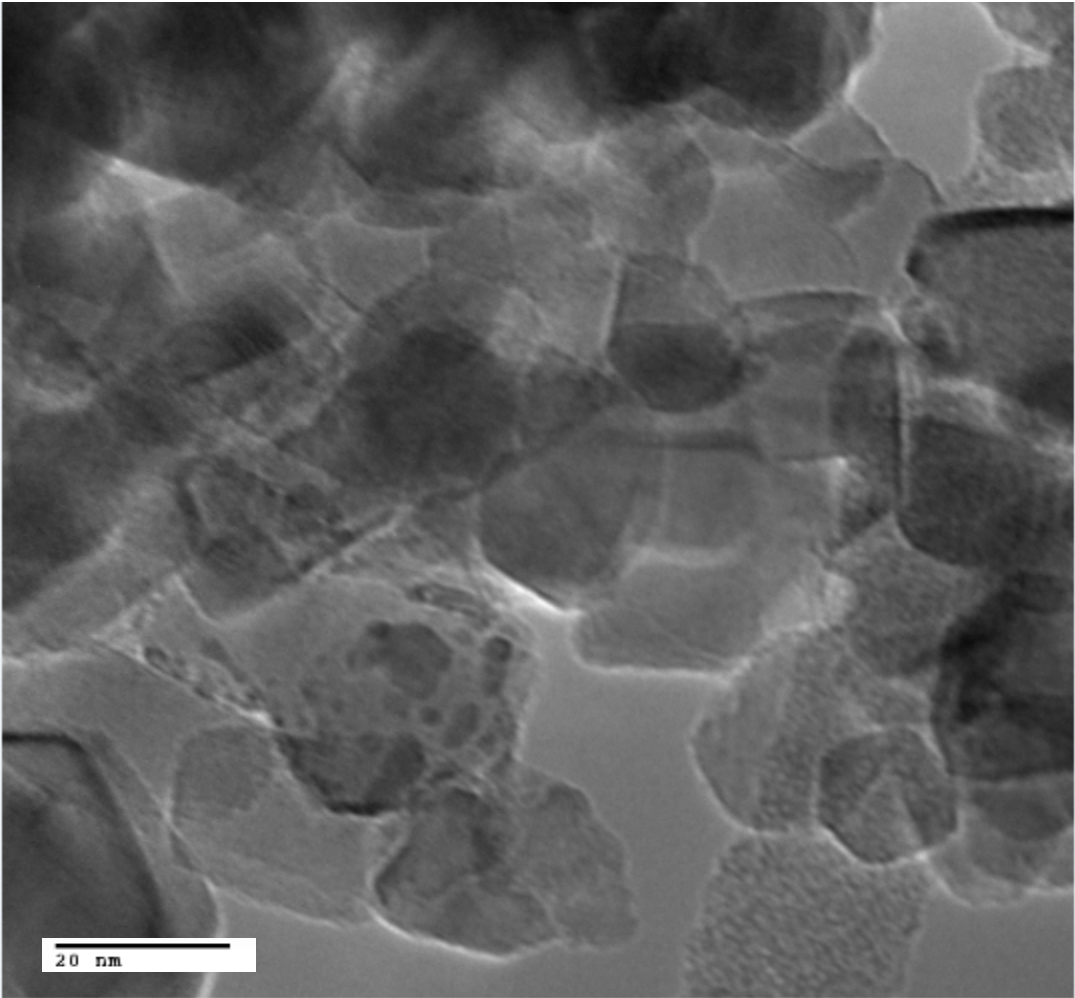

**Fig S3:** TEM image of RuTiP500 samples pre-reduced at 400°C for one hour before imaging.
